# Supplementary material
Source: PubMed Central journal article supplement (PMC7521603)

**Supplemental Table S1: International Classification of Disease 9th Revision (ICD-9) Codes for the study cohort.**

| <b>ICD-9 Diagnosis and Procedure Codes</b> |                                                                                                                                                                            |
|--------------------------------------------|----------------------------------------------------------------------------------------------------------------------------------------------------------------------------|
| Cervical cancer                            | 180                                                                                                                                                                        |
| Uterine cancer                             | 179, 182                                                                                                                                                                   |
| Vaginal cancer                             | 1840                                                                                                                                                                       |
| Vulvar cancer                              | 1841, 1842, 1843, 1844                                                                                                                                                     |
| Lymphadenectomy                            | 400, 401, 4024, 4029, 403, 4052, 4053, 4054, 4059, 409                                                                                                                     |
| Colostomy                                  | 460, 461, 462, 463, 464, 466                                                                                                                                               |
| Urinary diversion                          | 565, 566, 567                                                                                                                                                              |
| Vaginal reconstruction                     | 706                                                                                                                                                                        |
| Transverse rectus myocutaneous flap        | 8572, 8573                                                                                                                                                                 |
| History of chemotherapy                    | V5811, V672, V8741                                                                                                                                                         |
| History of other malignancy                | See codes for CC14                                                                                                                                                         |
| History of metastatic disease              | See codes for CC16                                                                                                                                                         |
| Obesity                                    | 27800, 27801                                                                                                                                                               |
|                                            |                                                                                                                                                                            |
| <b>Postoperative Complications</b>         |                                                                                                                                                                            |
| Bladder injury                             | 8670, 8671                                                                                                                                                                 |
| Urethral injury                            | 8672, 8673                                                                                                                                                                 |
| Intestinal injury                          | 8632, 8633, 8634, 8635, 8628                                                                                                                                               |
| Vascular injury                            | 9020, 9021, 9022, 9023, 9024, 9025, 9028, 9029, 9049                                                                                                                       |
| Postoperative hemorrhage                   | 99811, 9582, 2851                                                                                                                                                          |
| Postoperative shock                        | 9980, 9954                                                                                                                                                                 |
| Wound complications                        | 9583, 99812, 99813, 9983, 9985, 99883                                                                                                                                      |
| Venous Thromboembolism/Pulmonary           | 452, 453, 4151, 4162                                                                                                                                                       |
| Cerebrovascular Accident                   | 4329, 433, 434, 435, 436, 437                                                                                                                                              |
| Myocardial Infarction                      | 410                                                                                                                                                                        |
| Pneumonia                                  | 480, 481, 482, 483, 484, 485, 486                                                                                                                                          |
| Respiratory Failure                        | 5184, 5185, 5188                                                                                                                                                           |
| Systemic Inflammatory Response             | 9959                                                                                                                                                                       |
| Ileus/Small Bowel Obstruction              | 5601, 5603, 5608, 5609                                                                                                                                                     |
| Heart failure                              | 39891, 40201, 40211, 40291, 40401, 40403, 40411, 40413, 40491, 40493, 4280, 4281, 42820, 42821, 42822, 42823, 42830, 42831, 42832, 42833, 42840, 42841, 42842, 42843, 4289 |
| Pyelonephritis                             | 590                                                                                                                                                                        |
| Intestinal perforation                     | 56983                                                                                                                                                                      |
| Abscess                                    | 56722, 56731, 56738, 5695                                                                                                                                                  |
| Fistula                                    | 5651, 56981, 59382, 5961, 5962, 5991, 619                                                                                                                                  |
| AKI                                        | 584                                                                                                                                                                        |
|                                            |                                                                                                                                                                            |
| <b>Charlson Comorbidity Index</b>          |                                                                                                                                                                            |
| CC1: Myocardial Infarction                 | 410, 411, 412                                                                                                                                                              |
| CC2: Congestive Heart Failure              | 39891, 40201, 40211, 40291, 40401, 40403, 40411, 40413, 40491, 40493, 4254, 4255, 4357, 4258, 4259, 428                                                                    |

|                                        |                                                                                                                                                                                                                                                                                                            |
|----------------------------------------|------------------------------------------------------------------------------------------------------------------------------------------------------------------------------------------------------------------------------------------------------------------------------------------------------------|
| CC3: Peripheral Vascular Disease       | 0930, 4373, 440, 441, 442, 443, 444, 445, 446, 447, 448, 449, 451, 452, 453, 454, 455, 456                                                                                                                                                                                                                 |
| CC4: Cerebrovascular Disease           | 3623, 430, 431, 432, 433, 434, 435, 436, 437, 438                                                                                                                                                                                                                                                          |
| CC5: Dementia                          | 290, 294, 331                                                                                                                                                                                                                                                                                              |
| CC6: Chronic Pulmonary Disease         | 415, 416, 490, 491, 492, 493, 494, 495, 496, 500, 501, 502, 503, 504, 505, 506, 507, 508, 510, 511, 512, 513, 514, 515, 516, 517, 518, 519                                                                                                                                                                 |
| CC7: Connective Tissue Disease         | 710, 711, 712, 713, 714, 715, 716                                                                                                                                                                                                                                                                          |
| CC8: Peptic Ulcer Disease              | 531, 532, 533, 534, 535                                                                                                                                                                                                                                                                                    |
| CC9: Mild Liver Disease                | 0701, 0703, 0705, 07070, 0709, 5710, 5713, 5714, 5716, 5718, 5719, 5731, 5732, 5733, 5738, 5739                                                                                                                                                                                                            |
| CC10: Diabetes without complications   | 2490, 2500                                                                                                                                                                                                                                                                                                 |
| CC11: Diabetes with complications      | 2491, 2492, 2493, 2494, 2495, 2496, 2497, 2498, 2499, 2501, 2502, 2503, 2504, 2505, 2506, 2507, 2508, 2509                                                                                                                                                                                                 |
| CC12: Paraplegia and hemiplegia        | 3341, 342, 343, 344                                                                                                                                                                                                                                                                                        |
| CC13: Renal disease                    | 403, 404, 580, 581, 582, 583, 584, 585, 586, 587, 588, 589, 590, 591, 592, 593                                                                                                                                                                                                                             |
| CC14: Cancer                           | 140, 141, 142, 143, 144, 145, 146, 147, 148, 149, 150, 151, 152, 153, 154, 155, 156, 157, 158, 159, 160, 161, 162, 163, 164, 165, 170, 171, 172, 173, 174, 175, 176, 179, 180, 181, 182, 183, 184, 185, 186, 187, 188, 189, 190, 191, 192, 193, 194, 195, 200, 201, 202, 203, 204, 205, 206, 207, 208, 209 |
| CC15: Moderate or Severe Liver Disease | 4560, 4561, 4562, 570, 5711, 5712, 5715, 572, 5730, 5734, 5735, V427, 99682                                                                                                                                                                                                                                |
| CC16: Metastatic Carcinoma             | 196, 197, 198, 199                                                                                                                                                                                                                                                                                         |
| CC17: HIV/AIDS                         | 042, 07953, 79571, V08                                                                                                                                                                                                                                                                                     |

**Supplemental Table S2. Medical inflation rate for total charge.**

| Year | Annual inflation rate (%) | Percent change to 2015 |
|------|---------------------------|------------------------|
| 2001 | 3.59                      | 63.79                  |
| 2002 | 3.50                      | 56.43                  |
| 2003 | 3.46                      | 50.37                  |
| 2004 | 3.37                      | 44.05                  |
| 2005 | 3.29                      | 38.21                  |
| 2006 | 3.21                      | 32.88                  |
| 2007 | 3.06                      | 27.26                  |
| 2008 | 2.97                      | 22.71                  |
| 2009 | 2.93                      | 18.94                  |
| 2010 | 2.84                      | 15.01                  |
| 2011 | 2.79                      | 11.62                  |
| 2012 | 2.49                      | 7.67                   |
| 2013 | 2.51                      | 5.08                   |
| 2014 | 2.63                      | 2.63                   |

Medical inflation rate at the time of surgery was corrected for interval percent change to 2015 value.

**Supplemental Table S3. Patient demographics (cervical cancer).**

| Characteristic           | All             | 2001-2005      | 2006-2010      | 2011-2015      | <i>P</i> -value  |
|--------------------------|-----------------|----------------|----------------|----------------|------------------|
| Number                   | <i>n</i> =1,194 | <i>n</i> =347  | <i>n</i> =437  | <i>n</i> =410  |                  |
| Age (yr)                 | 50 (IQR 42-56)  | 48 (IQR 39-56) | 51 (IQR 43-56) | 51 (IQR 40-58) | 0.109            |
| <50                      | 584 (48.9%)     | 194 (55.9%)    | 197 (45.0%)    | 193 (47.2%)    |                  |
| 50-69                    | 553 (46.3%)     | 130 (37.5%)    | 226 (51.6%)    | 197 (48.2%)    |                  |
| ≥70                      | 57 (4.8%)       | 23 (6.6%)      | 15 (3.4%)      | 19 (4.6%)      |                  |
| Race/ethnicity           |                 |                |                |                | <b>&lt;0.001</b> |
| White                    | 669 (56.0%)     | 199 (57.3%)    | 238 (54.5%)    | 232 (56.6%)    |                  |
| Black                    | 134 (11.2%)     | 23 (6.6%)      | 48 (11.0%)     | 63 (15.4%)     |                  |
| Hispanic                 | 159 (13.3%)     | 22 (6.3%)      | 71 (16.2%)     | 66 (16.1%)     |                  |
| Others                   | 59 (4.9%)       | 15 (4.3%)      | 19 (4.3%)      | 25 (6.1%)      |                  |
| Missing                  | 173 (14.5%)     | 88 (25.4%)     | 61 (14.0%)     | 24 (5.9%)      |                  |
| Obesity                  |                 |                |                |                | **               |
| No                       | 1,083 (90.7%)   | 338 (97.4%)    | 399 (91.3%)    | 346 (84.4%)    |                  |
| Yes                      | 111 (9.3%)      | *              | 38 (8.7%)      | 64 (15.6%)     |                  |
| Charlson Index           |                 |                |                |                | <b>&lt;0.001</b> |
| 0                        | 536 (44.9%)     | 175 (50.4%)    | 202 (46.2%)    | 159 (38.8%)    |                  |
| 1                        | 232 (19.4%)     | 91 (26.2%)     | 56 (12.8%)     | 85 (20.7%)     |                  |
| 2                        | 138 (11.6%)     | 19 (5.5%)      | 81 (18.5%)     | 38 (9.3%)      |                  |
| 3-5                      | 116 (9.7%)      | 14 (4.0%)      | 28 (6.4%)      | 74 (18.0%)     |                  |
| ≥6                       | 172 (14.4%)     | 48 (13.8%)     | 70 (16.0%)     | 54 (13.2%)     |                  |
| Median household income  |                 |                |                |                | <b>&lt;0.001</b> |
| ≤\$38,999                | 290 (24.3%)     | 60 (17.2%)     | 137 (31.4%)    | 93 (22.7%)     |                  |
| \$39,000-\$47,999        | 330 (27.6%)     | 100 (28.7%)    | 123 (28.2%)    | 107 (26.1%)    |                  |
| \$48,000-\$62,999        | 308 (25.8%)     | 94 (27.0%)     | 95 (21.8%)     | 119 (29.0%)    |                  |
| ≥\$63,000                | 209 (17.5%)     | 81 (23.3%)     | 62 (14.2%)     | 66 (16.1%)     |                  |
| Missing                  | 57 (4.8%)       | 13 (3.7%)      | 19 (4.4%)      | 25 (6.1%)      |                  |
| Primary expected payer   |                 |                |                |                | **               |
| Medicare                 | 137 (11.5%)     | 35 (10.1%)     | 33 (7.6%)      | 69 (16.8%)     |                  |
| Medicaid                 | 411 (34.4%)     | 97 (27.9%)     | 171 (39.2%)    | 143 (34.9%)    |                  |
| Private including HMO    | 555 (46.5%)     | 198 (56.9%)    | 169 (38.8%)    | 188 (45.9%)    |                  |
| Others/missing           | 91 (7.6%)       | 18 (5.2%)      | 63 (14.4%)     | *              |                  |
| Hospital bedsize         |                 |                |                |                | 0.560            |
| Small                    | 91 (7.7%)       | 24 (6.9%)      | 32 (7.3%)      | 35 (8.7%)      |                  |
| Medium                   | 197 (16.6%)     | 52 (14.9%)     | 81 (18.5%)     | 64 (15.8%)     |                  |
| Large                    | 901 (75.8%)     | 272 (78.2%)    | 324 (74.1%)    | 305 (75.5%)    |                  |
| Hospital teaching status |                 |                |                |                | **               |
| Rural                    | *               | *              | *              | *              |                  |
| Urban Non-Teaching       | 119 (10.0%)     | 48 (13.8%)     | 32 (7.3%)      | 39 (9.7%)      |                  |
| Urban Teaching           | 1,063 (89.6%)   | 294 (84.7%)    | 404 (92.7%)    | 365 (90.3%)    |                  |
| Hospital region          |                 |                |                |                | <b>&lt;0.001</b> |
| Northeast                | 153 (12.8%)     | 37 (10.7%)     | 47 (10.8%)     | 69 (16.9%)     |                  |
| Midwest                  | 218 (18.3%)     | 80 (23.1%)     | 67 (15.3%)     | 71 (17.4%)     |                  |
| South                    | 525 (44.0%)     | 173 (49.9%)    | 205 (46.9%)    | 147 (35.9%)    |                  |
| West                     | 297 (24.9%)     | 57 (16.4%)     | 118 (27.0%)    | 122 (29.8%)    |                  |

Median (IQR) or number (percent per column) is shown. Kruskal-Wallis *H* test or chi-square test for *P*-values. Significant *P*-values are emboldened. \*indicated number of ≤10, required to suppress per the Healthcare Cost and Utilization Project. \*\*not assessed due to suppressed number.

**Supplemental Table S4. Surgical performance and perioperative outcome of pelvic exenteration (cervical cancer).**

| Characteristic                        | All                               | 2001-2005                         | 2006-2010                          | 2011-2015                          | P-value          |
|---------------------------------------|-----------------------------------|-----------------------------------|------------------------------------|------------------------------------|------------------|
| Number                                | <i>n</i> =1,194                   | <i>n</i> =347                     | <i>n</i> =437                      | <i>n</i> =410                      |                  |
| Lymphadenectomy                       |                                   |                                   |                                    |                                    | <b>0.026</b>     |
| No                                    | 656 (54.9%)                       | 175 (50.4%)                       | 235 (53.8%)                        | 246 (60.0%)                        |                  |
| Yes                                   | 538 (45.1%)                       | 172 (49.6%)                       | 202 (46.2%)                        | 164 (40.0%)                        |                  |
| Colostomy                             |                                   |                                   |                                    |                                    | 0.363            |
| No                                    | 442 (37.0%)                       | 128 (36.9%)                       | 172 (39.4%)                        | 142 (34.6%)                        |                  |
| Yes                                   | 752 (63.0%)                       | 219 (63.1%)                       | 265 (60.6%)                        | 268 (65.4%)                        |                  |
| Urinary diversion                     |                                   |                                   |                                    |                                    | <b>0.020</b>     |
| No                                    | 168 (14.1%)                       | 62 (17.9%)                        | 62 (14.2%)                         | 44 (10.8%)                         |                  |
| Yes                                   | 1,025 (85.9%)                     | 285 (82.1%)                       | 375 (85.8%)                        | 365 (89.2%)                        |                  |
| Vaginal reconstruction                |                                   |                                   |                                    |                                    | 0.235            |
| No                                    | 892 (74.7%)                       | 270 (77.6%)                       | 326 (74.8%)                        | 296 (72.2%)                        |                  |
| Yes                                   | 302 (25.3%)                       | 78 (22.4%)                        | 110 (25.2%)                        | 114 (27.8%)                        |                  |
| Complication (any)                    |                                   |                                   |                                    |                                    | <b>&lt;0.001</b> |
| 0                                     | 536 (44.9%)                       | 175 (50.4%)                       | 202 (46.2%)                        | 159 (38.8%)                        |                  |
| 1                                     | 232 (19.4%)                       | 91 (26.2%)                        | 56 (12.8%)                         | 85 (20.7%)                         |                  |
| 2                                     | 138 (11.6%)                       | 19 (5.5%)                         | 81 (18.5%)                         | 38 (9.3%)                          |                  |
| ≥3                                    | 116 (9.7%)                        | 14 (4.0%)                         | 28 (6.4%)                          | 74 (18.0%)                         |                  |
| Death                                 |                                   |                                   |                                    |                                    | **               |
| No                                    | 1,184 (99.2%)                     | 347 (100%)                        | 432 (98.9%)                        | 405 (98.8%)                        |                  |
| Yes                                   | *                                 | *                                 | *                                  | *                                  |                  |
| Length of stay (day)                  |                                   |                                   |                                    |                                    | <b>0.004</b>     |
| <28                                   | 970 (81.2%)                       | 291 (83.6%)                       | 367 (84.2%)                        | 312 (76.1%)                        |                  |
| ≥28                                   | 224 (18.8%)                       | 57 (16.4%)                        | 69 (15.8%)                         | 98 (23.9%)                         |                  |
| Total charge (crude)                  | \$120,606<br>(IQR 73,399-210,837) | \$79,870<br>(IQR 58,327-196,684)  | \$128,890<br>(IQR 87,003-210,503)  | \$170,334<br>(IQR 140,217-269,958) | <b>&lt;0.001</b> |
| Total charge (corrected) <sup>†</sup> | \$148,766<br>(IQR 95,708-262,592) | \$119,062<br>(IQR 84,020-171,696) | \$159,917<br>(IQR 106,761-242,592) | \$178,987<br>(IQR 109,511-290,664) | <b>&lt;0.001</b> |

Median (IQR) or number (percent per column) is shown. Kruskal-Wallis *H* test or chi-square test for *P*-values. Significant *P*-values are emboldened. \*indicated number of ≤10, required to suppress per the Healthcare Cost and Utilization Project. \*\*not assessed due to suppressed number. †converted to 2015 value based on medical inflation rate (Table S2).

**Supplemental Table S5. Salient demographics per cancer type (post-hoc analysis).**

| Characteristic | Cervical      | Uterine     | Vaginal     | Vulvar      | <i>P</i> -value  |
|----------------|---------------|-------------|-------------|-------------|------------------|
|                | 50            | 64          | 61          | 65          |                  |
| Age            | (IQR 42-56)   | (IQR 54-72) | (IQR 54-69) | (IQR 55-71) | <b>&lt;0.001</b> |
| <50            | 583 (48.9%)   | 62 (15.7%)  | 118 (16.4%) | 28 (8.5%)   |                  |
| 50-69          | 553 (46.4%)   | 222 (56.3%) | 439 (60.2%) | 196 (59.6%) |                  |
| ≥70            | 57 (4.8%)     | 110 (27.9%) | 172 (23.6%) | 105 (31.9%) |                  |
| Obesity        |               |             |             |             | <b>&lt;0.001</b> |
| No             | 1,083 (90.7%) | 333 (84.3%) | 628 (86.1%) | 298 (90.9%) |                  |
| Yes            | 111 (9.3%)    | 62 (15.7%)  | 101 (13.9%) | 30 (9.1%)   |                  |
| Charlson Index |               |             |             |             | <b>&lt;0.001</b> |
| 2              | 546 (45.8%)   | 144 (36.5%) | 314 (43.0%) | 95 (29.0%)  |                  |
| 3-4            | 359 (30.1%)   | 97 (24.6%)  | 247 (33.8%) | 137 (41.8%) |                  |
| 5-8            | 216 (18.1%)   | 87 (22.0%)  | 123 (16.8%) | 53 (16.2%)  |                  |
| 9-15           | 72 (6.0%)     | 67 (17.0%)  | 46 (6.3%)   | 43 (13.1%)  |                  |

Median (IQR) or number (percent per column) is shown. Kruskal-Wallis *H* test or chi-square test for *P*-values. Significant *P*-values are emboldened. \*indicated number of ≤10, required to suppress per the Healthcare Cost and Utilization Project. \*\*not assessed due to suppressed number.

**Supplemental Figure S1. Regression-tree model for death during index admission.**

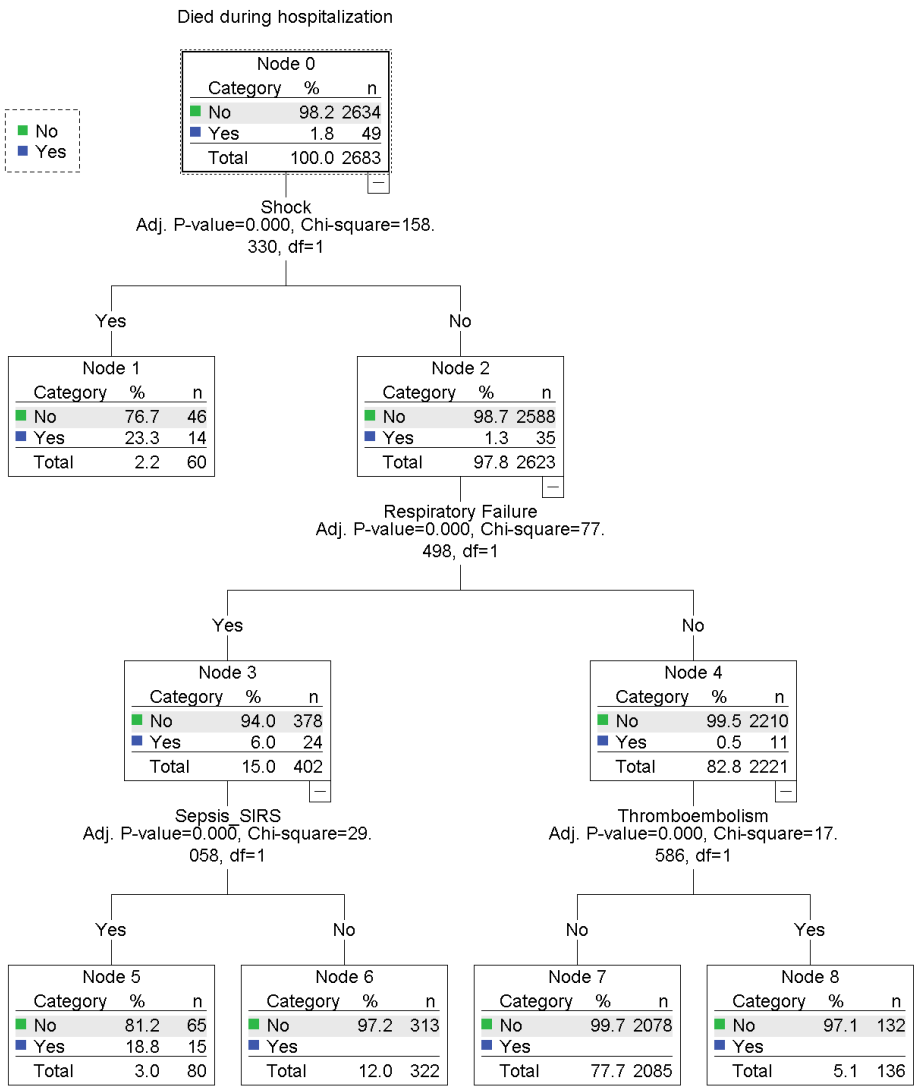

Regression-tree models for death during the index admission are shown for complication types. Empty boxes indicated numbers of  $\leq 10$ , required to suppress per the Healthcare Cost and Utilization Project.

Supplemental Figure S2. Box plots for crude total charge per year.

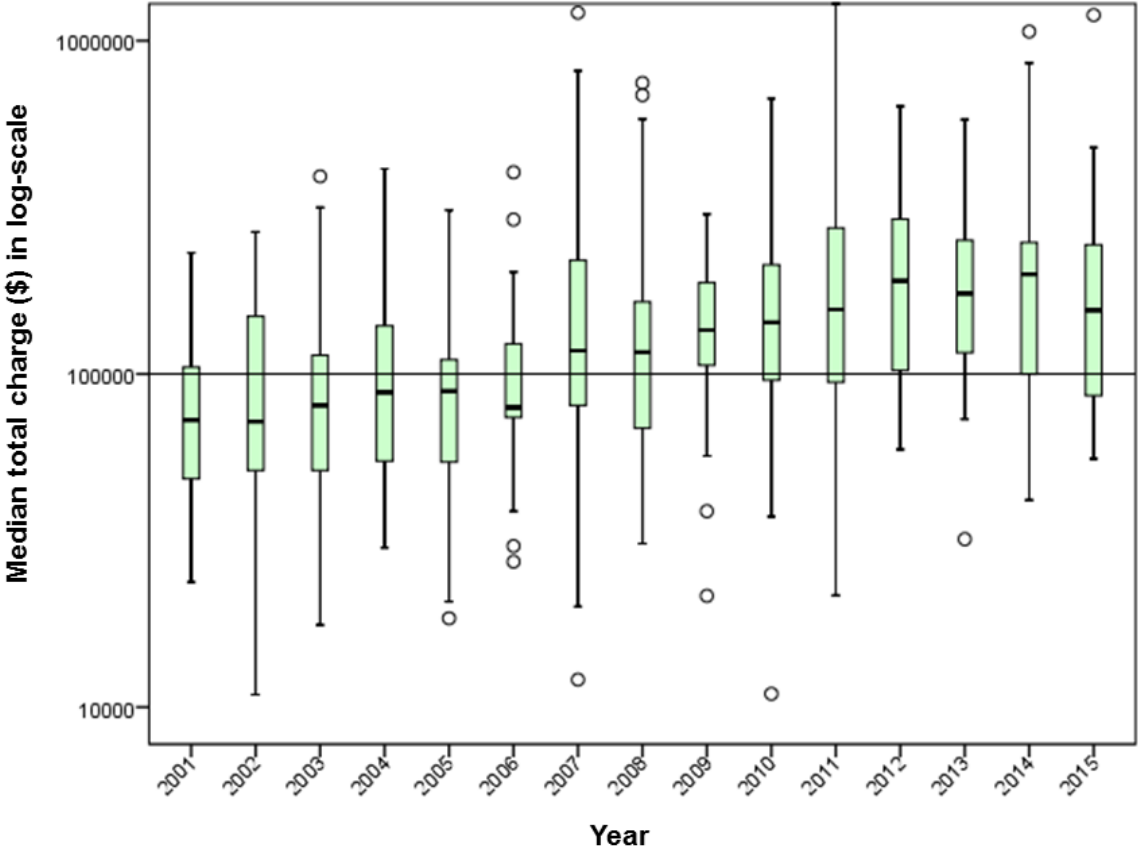

Supplement: NIHMS1627575-supplement-Supplemental_tables_and_figures.pdf [file NIHMS1627575-supplement-Supplemental_tables_and_figures.pdf]
